# Supplementary material for: Changes in Inner Retina Thickness and Macular Sensitivity in Patients with Type 2 Diabetes with Moderate Diabetic Retinopathy
Source: MDPI journal article supplement (doi:10.3390/biomedicines11112972), 2023-11-04
Supplement: s1 [file s1]

## Supplementary Material

|            | RNFL OS                 |       | RNFL OT                 |       | RNFL OI                 |              | RNFL ON                 |       | RNFL IS                 |              | RNFL IT                 |              | RNFL II                 |       | RNFL IN                 |              | RNFL C global           |              |
|------------|-------------------------|-------|-------------------------|-------|-------------------------|--------------|-------------------------|-------|-------------------------|--------------|-------------------------|--------------|-------------------------|-------|-------------------------|--------------|-------------------------|--------------|
|            | Correlation coefficient | p     | Correlation coefficient | p     | Correlation coefficient | p            | Correlation coefficient | p     | Correlation coefficient | p            | Correlation coefficient | p            | Correlation coefficient | p     | Correlation coefficient | p            | Correlation coefficient | p            |
| Colesterol | 0.041                   | 0.770 | 0.002                   | 0.987 | 0.074                   | 0.592        | 0.105                   | 0.452 | 0.231                   | 0.093        | -0.087                  | 0.533        | 0.160                   | 0.247 | 0.111                   | 0.423        | 0.004                   | 0.977        |
| HDL        | -0.080                  | 0.565 | -0.121                  | 0.384 | -0.122                  | 0.380        | -0.094                  | 0.498 | -0.085                  | 0.543        | <b>-0.362</b>           | <b>0.007</b> | -0.246                  | 0.073 | -0.221                  | 0.108        | <b>-0.292</b>           | <b>0.032</b> |
| LDL        | 0.091                   | 0.515 | -0.034                  | 0.810 | 0.092                   | 0.510        | 0.081                   | 0.560 | <b>0.285</b>            | <b>0.037</b> | -0.100                  | 0.471        | 0.145                   | 0.297 | 0.118                   | 0.397        | -0.001                  | 0.996        |
| TG         | -0.099                  | 0.475 | 0.133                   | 0.336 | 0.040                   | 0.774        | -0.002                  | 0.987 | -0.043                  | 0.755        | 0.143                   | 0.303        | 0.155                   | 0.264 | 0.086                   | 0.535        | 0.214                   | 0.120        |
| FR         | -0.010                  | 0.945 | -0.082                  | 0.554 | 0.127                   | 0.361        | 0.000                   | 0.998 | -0.027                  | 0.848        | -0.212                  | 0.124        | -0.034                  | 0.809 | -0.218                  | 0.113        | <b>-0.465</b>           | <b>0.000</b> |
| Creatinine | 0.114                   | 0.413 | 0.148                   | 0.286 | -0.081                  | 0.559        | 0.027                   | 0.846 | 0.112                   | 0.420        | <b>0.280</b>            | <b>0.040</b> | 0.065                   | 0.641 | <b>0.271</b>            | <b>0.048</b> | <b>0.452</b>            | <b>0.001</b> |
| BCVA       | 0.082                   | 0.554 | -0.165                  | 0.233 | <b>-0.301</b>           | <b>0.027</b> | -0.226                  | 0.101 | 0.141                   | 0.310        | 0.128                   | 0.357        | -0.157                  | 0.257 | <b>0.351</b>            | <b>0.009</b> | 0.252                   | 0.066        |
| S.E.       | 0.033                   | 0.813 | -0.121                  | 0.384 | -0.231                  | 0.093        | -0.129                  | 0.354 | <b>-0.318</b>           | <b>0.019</b> | -0.003                  | 0.980        | -0.068                  | 0.627 | 0.156                   | 0.261        | 0.033                   | 0.811        |
| A.L.       | 0.058                   | 0.676 | 0.201                   | 0.146 | 0.259                   | 0.059        | 0.236                   | 0.086 | <b>0.416</b>            | <b>0.002</b> | 0.227                   | 0.098        | 0.299                   | 0.028 | 0.210                   | 0.127        | <b>0.318</b>            | <b>0.019</b> |
| IOP        | -0.025                  | 0.860 | -0.190                  | 0.170 | -0.093                  | 0.504        | 0.043                   | 0.757 | -0.117                  | 0.401        | -0.141                  | 0.309        | -0.035                  | 0.801 | -0.106                  | 0.447        | -0.239                  | 0.082        |

**Suppl. Table S1:** Correlations between clinical variables (HDL, high-density lipoprotein; LDL, low-density lipoprotein; TG, triglycerides; FR, filtrate rate; BCVA, best-corrected visual acuity; SE, spherical equivalent; AL, axial length; IOP, intraocular pressure) in DM2 patients and RNFL thickness by OCT in the nine areas of the early treatment diabetic retinopathy study (ETDRS) grid (OS, Outer Superior; OT, Outer Temporal; OI, Outer Inferior; ON, Outer Nasal; IS, Inner Superior; IT, Inner Temporal; II, Inner Inferior, IN: Inner Nasal; C, Central; and where temporal quadrants are represented left and nasal quadrants are represented right). The values that reached statistical significance ( $p < 0.05$ ) are shown in bold with a grey background.

|             | GCL+ OS                 |              | GCL + OT                |       | GCL + OI                |       | GCL + ON                |               | GCL + IS                |              | GCL + IT                |               | GCL + II                |              | GCL + IN                |       | GCL + C global          |              |
|-------------|-------------------------|--------------|-------------------------|-------|-------------------------|-------|-------------------------|---------------|-------------------------|--------------|-------------------------|---------------|-------------------------|--------------|-------------------------|-------|-------------------------|--------------|
|             | Correlation coefficient | p            | Correlation coefficient | p     | Correlation coefficient | p     | Correlation coefficient | p             | Correlation coefficient | p            | Correlation coefficient | p             | Correlation coefficient | p            | Correlation coefficient | p     | Correlation coefficient | p            |
| Cholesterol | 0.103                   | 0.478        | 0.103                   | 0.477 | 0.191                   | 0.183 | 0.113                   | 0.434         | 0.084                   | 0.563        | 0.072                   | 0.621         | 0.171                   | 0.234        | 0.166                   | 0.251 | 0.008                   | 0.958        |
| HDL         | -0.205                  | 0.153        | 0.051                   | 0.723 | -0.116                  | 0.422 | -0.026                  | 0.860         | <b>-0.288</b>           | <b>0.043</b> | <b>-0.298</b>           | <b>0.035</b>  | -0.245                  | 0.087        | -0.109                  | 0.405 | <b>-0.379</b>           | <b>0.007</b> |
| LDL         | -0.114                  | 0.421        | 0.056                   | 0.699 | 0.049                   | 0.737 | 0.128                   | 0.376         | 0.067                   | 0.641        | 0.070                   | 0.630         | 0.077                   | 0.597        | 0.360                   | 0.275 | -0.065                  | 0.652        |
| TG          | <b>0.296</b>            | <b>0.037</b> | -0.029                  | 0.843 | 0.185                   | 0.197 | 0.146                   | 0.313         | <b>0.307</b>            | <b>0.030</b> | 0.215                   | 0.133         | <b>0.296</b>            | <b>0.037</b> | 0.179                   | 0.214 | 0.264                   | 0.063        |
| FR          | 0.144                   | 0.319        | 0.097                   | 0.505 | 0.181                   | 0.208 | 0.205                   | 0.153         | 0.028                   | 0.844        | 0.003                   | 0.984         | 0.118                   | 0.415        | -0.055                  | 0.704 | <b>-0.371</b>           | <b>0.008</b> |
| Creatinine  | -0.123                  | 0.393        | -0.014                  | 0.921 | -0.122                  | 0.397 | -0.189                  | 0.189         | -0.029                  | 0.844        | 0.064                   | 0.660         | -0.078                  | 0.591        | 0.120                   | 0.407 | <b>0.475</b>            | <b>0.000</b> |
| BCVA        | -0.242                  | 0.090        | -0.094                  | 0.516 | -0.152                  | 0.292 | <b>-0.226</b>           | <b>-0.291</b> | 0.041                   | 0.374        | -0.067                  | 0.643         | -0.064                  | 0.658        | -0.131                  | 0.363 | 0.158                   | 0.273        |
| S.E.        | -0.113                  | 0.436        | -0.033                  | 0.818 | -0.115                  | 0.427 | -0.141                  | 0.328         | 0.068                   | 0.641        | 0.021                   | 0.887         | -0.017                  | 0.909        | -0.129                  | 0.371 | -0.026                  | 0.857        |
| A.L.        | 0.074                   | 0.610        | -0.135                  | 0.349 | -0.109                  | 0.452 | -0.109                  | 0.451         | -0.117                  | 0.419        | 0.003                   | 0.984         | -0.139                  | 0.337        | -0.064                  | 0.657 | <b>0.325</b>            | <b>0.021</b> |
| IOP         | <b>-0.292</b>           | <b>0.039</b> | -0.169                  | 0.240 | -0.182                  | 0.206 | -0.212                  | 0.139         | <b>-0.377</b>           | <b>0.007</b> | <b>-0.348</b>           | <b>0.0013</b> | -0.231                  | 0.107        | -0.334                  | 0.018 | -0.362                  | 0.010        |

**Suppl. Table S2:** Correlations between clinical variables (HDL, high-density lipoprotein; LDL, low-density lipoprotein; TG, triglycerides; FR, filtrate rate; BCVA, best-corrected visual acuity; SE, spherical equivalent; AL, axial length; IOP, intraocular pressure) in DM2 patients and GCL+ (GC-IPL) thickness by OCT in the nine areas of the early treatment diabetic retinopathy study (ETDRS) grid (OS, Outer Superior; OT, Outer Temporal; OI, Outer Inferior; ON, Outer Nasal; IS, Inner Superior; IT, Inner Temporal; II, Inner Inferior, IN: Inner Nasal; C, Central; and where temporal quadrants are represented left and nasal quadrants are represented right). The values that reached statistical significance ( $p < 0.05$ ) are shown in bold with a grey background.

|            | GCL++ OS                |       | GCL ++ OT               |       | GCL ++ OI               |              | GCL ++ ON               |              | GCL ++ IS               |       | GCL ++ IT               |       | GCL ++ II               |       | GCL ++ IN               |       | GCL ++ C global         |              |
|------------|-------------------------|-------|-------------------------|-------|-------------------------|--------------|-------------------------|--------------|-------------------------|-------|-------------------------|-------|-------------------------|-------|-------------------------|-------|-------------------------|--------------|
|            | Correlation coefficient | p     | Correlation coefficient | p     | Correlation coefficient | p            | Correlation coefficient | p            | Correlation coefficient | p     | Correlation coefficient | p     | Correlation coefficient | p     | Correlation coefficient | p     | Correlation coefficient | p            |
| Colesterol | -0.024                  | 0.864 | 0.155                   | 0.269 | 0.051                   | 0.717        | -0.026                  | 0.854        | 0.047                   | 0.738 | 0.125                   | 0.373 | 0.160                   | 0.253 | -0.006                  | 0.966 | 0.056                   | 0.691        |
| HDL        | -0.181                  | 0.194 | -0.036                  | 0.799 | -0.110                  | 0.435        | -0.049                  | 0.729        | -0.244                  | 0.079 | -0.250                  | 0.070 | -0.197                  | 0.158 | -0.161                  | 0.148 | <b>-0.383</b>           | <b>0.005</b> |
| LDL        | -0.056                  | 0.689 | 0.138                   | 0.323 | 0.058                   | 0.682        | -0.005                  | 0.974        | 0.059                   | 0.675 | 0.073                   | 0.603 | 0.144                   | 0.305 | 0.020                   | 0.890 | 0.021                   | 0.882        |
| TG         | 0.081                   | 0.564 | 0.027                   | 0.845 | 0.041                   | 0.771        | 0.037                   | 0.790        | 0.150                   | 0.285 | 0.197                   | 0.157 | 0.167                   | 0.233 | 0.073                   | 0.605 | 0.255                   | 0.063        |
| FG         | 0.105                   | 0.454 | 0.082                   | 0.561 | 0.171                   | 0.220        | 0.120                   | 0.390        | 0.070                   | 0.621 | -0.118                  | 0.400 | 0.115                   | 0.413 | -0.069                  | 0.625 | <b>-0.383</b>           | <b>0.008</b> |
| Creatinine | -0.048                  | 0.733 | -0.052                  | 0.714 | -0.095                  | 0.500        | -0.106                  | 0.451        | -0.064                  | 0.649 | 0.144                   | 0.304 | -0.082                  | 0.558 | 0.135                   | 0.335 | <b>0.448</b>            | <b>0.001</b> |
| BCVA       | 0.111                   | 0.430 | 0.141                   | 0.312 | 0.061                   | 0.662        | 0.024                   | 0.863        | 0.026                   | 0.853 | 0.160                   | 0.252 | 0.103                   | 0.463 | 0.052                   | 0.712 | <b>-0.396</b>           | <b>0.003</b> |
| S.E.       | -0.123                  | 0.379 | -0.131                  | 0.350 | -0.125                  | 0.374        | -0.064                  | 0.651        | -0.200                  | 0.152 | -0.190                  | 0.174 | -0.160                  | 0.254 | -0.220                  | 0.113 | -0.307                  | 0.025        |
| A.L.       | 0.033                   | 0.820 | 0.019                   | 0.895 | 0.132                   | 0.355        | 0.100                   | 0.484        | -0.134                  | 0.348 | -0.108                  | 0.449 | -0.088                  | 0.540 | 0.052                   | 0.719 | -0.128                  | 0.372        |
| IOP        | 0.244                   | 0.084 | 0.028                   | 0.845 | <b>0.377</b>            | <b>0.006</b> | <b>0.283</b>            | <b>0.044</b> | 0.018                   | 0.901 | -0.035                  | 0.805 | 0.131                   | 0.360 | 0.188                   | 0.186 | -0.150                  | 0.295        |

**Suppl. Table S3:** Correlations between clinical variables (HDL, high-density lipoprotein; LDL, low-density lipoprotein; TG, triglycerides; FR, filtrate rate; BCVA, best-corrected visual acuity; SE, spherical equivalent; AL, axial length; IOP, intraocular pressure) in DM2 patients and GCL ++ (ILM - IPL/INL [GCC]) thickness by OCT in the nine areas of the early treatment diabetic retinopathy study (ETDRS) grid (OS, Outer Superior; OT, Outer Temporal; OI, Outer Inferior; ON, Outer Nasal; IS, Inner Superior; IT, Inner Temporal; II, Inner Inferior, IN: Inner Nasal; C, Central; and where temporal quadrants are represented left and nasal quadrants are represented right). The values that reached statistical significance ( $p < 0.05$ ) are shown in bold with a grey background.
